# Supplementary material for: Diving Deeper into Wreck Diver Motivations and Attitudes
Source: MDPI journal article supplement (doi:10.3390/tourhosp2020012), 2021-05-11
Supplement: s1 [file s1]

## Supplementary Material

**Table S1: Frequency of participation in wreck diving**

| <b>Descriptor / variable</b> | <b>Frequency (N)</b> | <b>Frequency (%)</b> |
|------------------------------|----------------------|----------------------|
| Frequently                   | 245                  | 34.1                 |
| Occasionally                 | 322                  | 44.8                 |
| Rarely                       | 86                   | 11.9                 |
| <5 times                     | 66                   | 9.2                  |
| <b>Total</b>                 | <b>719</b>           | <b>100</b>           |

**Table S2: Motivations to wreck dive – Statistically significant differences**

| Cluster          | Motivation factor                          | Rank | Mean | $\chi^2$ or $H$ result                    | Adjusted $p$ -value (pairwise comparison) | More important to                         | Less important to                                                     |
|------------------|--------------------------------------------|------|------|-------------------------------------------|-------------------------------------------|-------------------------------------------|-----------------------------------------------------------------------|
| History/heritage | Seeing historically significant shipwrecks | 1    | 3.99 | $\chi^2 = 15.878$ , $df = 4$ , $p = .003$ | -                                         | Males                                     | Females                                                               |
|                  |                                            |      |      | $H(6) = 18.743$ , $p = .005$              | $p = .019$<br>$p = .007$                  | Japan                                     | Australia<br>United States                                            |
|                  |                                            |      |      | $H(6) = 20.487$ , $p = .002$              | $p = .009$                                | Technical                                 | Open water                                                            |
|                  |                                            |      |      | $H(3) = 41.278$ , $p < .001$              | $p = .003$<br>$p < .001$                  | Frequently wreck dive                     | Occasionally wreck dive<br>Rarely wreck dive                          |
|                  |                                            |      |      |                                           | $p < .001$                                | Occasionally wreck dive                   | Rarely wreck dive                                                     |
|                  |                                            |      |      |                                           | $p = .006$                                | Wreck dived < 5 times                     | rarely                                                                |
|                  | Seeing artefacts                           | 3    | 3.82 | $\chi^2 = 17.264$ , $df = 4$ , $p = .002$ | -                                         | Males                                     | Females                                                               |
|                  |                                            |      |      | $H(6) = 13.644$ , $p = .034$              | $p = .030$                                | Japan                                     | United States                                                         |
|                  |                                            |      |      | $H(6) = 15.968$ , $p = .014$              | $p = .019$                                | Technical                                 | Advanced open water                                                   |
|                  |                                            |      |      | $H(3) = 38.341$ , $p < .001$              | $p = .001$<br>$p < .001$                  | Frequently wreck dive                     | Occasionally wreck dive<br>Rarely wreck dive                          |
|                  |                                            |      |      |                                           | $p = .003$                                | Occasionally wreck dive                   | Rarely wreck dive                                                     |
|                  | Researching & learning                     | 6    | 3.40 | $H(6) = 31.319$ , $p < .001$              | $p < .001$<br>$p = .040$                  | Technical<br>Instructor/master instructor | Advanced open water                                                   |
|                  |                                            |      |      | $H(3) = 57.548$ , $p < .001$              | $p < .001$                                | Frequently wreck dive                     | Occasionally wreck dive<br>Rarely wreck dive<br>Wreck dived < 5 times |
|                  |                                            |      |      |                                           | $p < .001$                                | Occasionally wreck dive                   | Wreck dived < 5 times                                                 |
|                  |                                            |      |      |                                           |                                           |                                           |                                                                       |
| Environmental    | Seeing marine life                         | 2    | 3.94 | $\chi^2 = 29.143$ , $df = 4$ , $p < .001$ | -                                         | Females                                   | Males                                                                 |
|                  |                                            |      |      | $H(6) = 24.041$ , $p = .001$              | $p = .005$                                | United States                             | Other countries                                                       |
|                  |                                            |      |      | $H(6) = 26.064$ , $p < .001$              | $p = .038$                                | ≤ 20 dives                                | 501-1,000 dives                                                       |
|                  |                                            |      |      |                                           | $p = .006$<br>$p = .003$                  | 21-50 dives                               | 501-1,000 dives<br>>1,000 dives                                       |

**Table S2: Motivations to wreck dive – Statistically significant differences (cont.)**

| Cluster                   | Motivation factor              | Rank | Mean | $\chi^2$ or $H$ result              | Adjusted $p$ -value (pairwise comparison)                                        | More important to                                                                                                  | Less important to                                                                                         |
|---------------------------|--------------------------------|------|------|-------------------------------------|----------------------------------------------------------------------------------|--------------------------------------------------------------------------------------------------------------------|-----------------------------------------------------------------------------------------------------------|
| Environmental (continued) | Seeing marine life (continued) | 2    | 3.94 | $H(6) = 60.256, p < .001$           | $p < .001$<br>$p < .001$<br>$p < .001$<br>$p < .001$<br>$p < .001$<br>$p = .004$ | Open water<br>Specialty<br>Advanced open water<br>Master scuba diver<br>Divemaster<br>Instructor/master instructor | Technical                                                                                                 |
|                           |                                |      |      | $H(6) = 15.671, p = .016$           | $p = .014$                                                                       | $\leq 5$ years diving                                                                                              | 11-15 years diving                                                                                        |
|                           |                                |      |      | $H(3) = 36.012, p < .001$           | $p < .001$                                                                       | Wreck dived $<5$ times<br>Rarely wreck dive<br>Occasionally wreck dive                                             | Frequently wreck dive                                                                                     |
|                           | Peace & tranquillity           | 4    | 3.78 | $\chi^2 = 15.756, df = 4, p = .003$ | -                                                                                | Females                                                                                                            | Males                                                                                                     |
|                           |                                |      |      | $H(6) = 29.832, p < .001$           | $p < .001$<br>$p < .001$<br>$p = .001$                                           | Japan                                                                                                              | Australia<br>United States<br>Other countries                                                             |
|                           |                                |      |      | $H(6) = 29.030, p < .001$           | $p = .045$                                                                       | $\leq 20$ dives                                                                                                    | 501-1,000 dives                                                                                           |
|                           |                                |      |      |                                     | $p = .008$                                                                       |                                                                                                                    | $>1,000$ dives                                                                                            |
|                           |                                |      |      |                                     | $p = .006$                                                                       | 21-50 dives                                                                                                        | $>1,000$ dives                                                                                            |
|                           |                                |      |      |                                     | $p = .042$                                                                       | 51-100 dives                                                                                                       | $>1,000$ dives                                                                                            |
|                           |                                |      |      | $H(6) = 32.540, p < .001$           | $p = .036$<br>$p < .001$<br>$p = .048$                                           | Open water<br>Advanced open water<br>Instructor/master instructors                                                 | Technical                                                                                                 |
|                           |                                |      |      | $H(6) = 30.237, p < .001$           | $p = .027$<br>$p = .013$<br>$p = .012$<br>$p = .002$<br>$p = .001$               | $\leq 5$ years diving                                                                                              | 6-10 years diving<br>11-15 years diving<br>16-20 years diving<br>26-30 years diving<br>$>30$ years diving |
|                           |                                |      |      | $H(3) = 23.659, p < .001$           | $p < .001$<br>$p = .020$<br>$p = .027$                                           | Wreck dived $<5$ times<br>Rarely wreck dive<br>Occasionally wreck dive                                             | Frequently wreck dive                                                                                     |
|                           |                                |      |      |                                     | $p = .041$                                                                       | Wreck dived $<5$ times                                                                                             | Occasionally wreck dive                                                                                   |

**Table S2: Motivations to wreck dive – Statistically significant differences (cont.)**

| Cluster                   | Motivation factor                 | Rank | Mean | $\chi^2$ or $H$ result              | Adjusted $p$ -value (pairwise comparison)            | More important to                                                   | Less important to                                                                |
|---------------------------|-----------------------------------|------|------|-------------------------------------|------------------------------------------------------|---------------------------------------------------------------------|----------------------------------------------------------------------------------|
| Environmental (continued) | Clear water                       | 5    | 3.41 | $\chi^2 = 11.231, df = 4, p = .024$ | -                                                    | Females                                                             | Males                                                                            |
|                           |                                   |      |      | $H(6) = 25.534, p < .001$           | $p = .004$<br>$p = .007$<br>$p = .001$               | Japan                                                               | Australia<br>United States<br>Other countries                                    |
|                           |                                   |      |      | $H(6) = 75.252, p < .001$           | $p = .021$<br>$p = .003$<br>$p < .001$               | $\leq 20$ dives                                                     | 251-500 dives<br>501-1,000 dives<br>>1,000 dives                                 |
|                           |                                   |      |      |                                     | $p = .009$<br>$p < .001$                             | 51-100 dives                                                        | 500-1,000 dives<br>>1,000 dives                                                  |
|                           |                                   |      |      | $H(6) = 95.179, p < .001$           | $p = .037$<br>$p < .001$<br>$p = .015$<br>$p = .002$ | Open water                                                          | Master scuba divers<br>Technical<br>Divemasters<br>Instructor/master instructors |
|                           |                                   |      |      |                                     | $p = .002$                                           | Specialty                                                           | Technical                                                                        |
|                           |                                   |      |      |                                     | $p < .001$<br>$p = .002$                             | Advanced open water                                                 | Technical<br>Instructor/master instructors                                       |
|                           |                                   |      |      |                                     | $p = .007$<br>$p < .001$<br>$p = .003$               | Master scuba divers<br>Divemasters<br>Instructor/master instructors | Technical                                                                        |
|                           |                                   |      |      | $H(6) = 25.370, p < .001$           | $p = .002$<br>$p = .017$<br>$p = .001$               | $\leq 5$ years diving                                               | 6-10 years diving<br>11-15 years diving<br>>30 years diving                      |
|                           |                                   |      |      | $H(3) = 71.275, p < .001$           | $p = .001$<br>$p < .001$                             | Wreck dived < 5 times                                               | Occasionally wreck dive<br>Frequently wreck dive                                 |
|                           |                                   |      |      |                                     | $p = .011$<br>$p < .001$                             | Rarely wreck dive                                                   | Occasionally wreck dive<br>Frequently wreck dive                                 |
|                           |                                   |      |      |                                     | $p < .001$                                           | Occasionally wreck dive                                             | Frequently wreck dive                                                            |
|                           | Observing effects of time (decay) | 7    | 3.34 | $H(6) = 20.634, p = .002$           | $p = .026$                                           | Divemasters                                                         | Advanced open water                                                              |
|                           |                                   |      |      | $H(3) = 33.335, p < .001$           | $p = .011$<br>$p < .001$<br>$p = .005$               | Frequently wreck dive                                               | Occasionally wreck dive<br>Rarely wreck dive<br>Wreck dived < 5 times            |

**Table S2: Motivations to wreck dive – Statistically significant differences (cont.)**

| Cluster                | Motivation factor                            | Rank | Mean | $\chi^2$ or $H$ result              | Adjusted $p$ -value (pairwise comparison)                          | More important to                                | Less important to                                                                          |
|------------------------|----------------------------------------------|------|------|-------------------------------------|--------------------------------------------------------------------|--------------------------------------------------|--------------------------------------------------------------------------------------------|
| Structure & technology | Complexity & size of a wreck                 | 7    | 3.34 | $\chi^2 = 32.487, df = 4, p < .001$ | -                                                                  | Males                                            | Females                                                                                    |
|                        |                                              |      |      | $H(5) = 13.507, p = .019$           | $p = .021$                                                         | Aged < 25 years                                  | Aged 55-64 years                                                                           |
|                        |                                              |      |      | $H(3) = 9.650, p = .022$            | $p = .024$                                                         | Trade qualifications                             | Bachelor or higher degree                                                                  |
|                        |                                              |      |      | $H(6) = 38.098, p < .001$           | $p = .029$<br>$p < .001$                                           | Technical                                        | Specialty<br>Advanced open water                                                           |
|                        |                                              |      |      | $H(3) = 55.305, p < .001$           | $p = .001$<br>$p < .001$<br>$p < .001$                             | Frequently wreck dive                            | Occasionally wreck dive<br>Rarely wreck dive<br>Wreck dived < 5 times                      |
|                        |                                              |      |      |                                     | $p = .011$<br>$p = .001$                                           | Occasionally wreck dive                          | Rarely wreck dive<br>Wreck dived < 5 times                                                 |
|                        | Exploring & discovering machinery & fittings | 10   | 3.15 | $\chi^2 = 50.723, df = 4, p < .001$ | -                                                                  | Males                                            | Females                                                                                    |
|                        |                                              |      |      | $H(3) = 11.727, p = .008$           | $p = .026$                                                         | Trade qualifications                             | Bachelor or higher degree                                                                  |
|                        |                                              |      |      | $H(6) = 51.768, p < .001$           | $p = .002$<br>$p = .007$<br>$p < .001$<br>$p = .044$               | Technical                                        | Open water<br>Specialty<br>Advanced open water<br>Master scuba diver                       |
|                        |                                              |      |      | $H(3) = 64.314, p < .001$           | $p < .001$<br>$p < .001$<br>$p < .001$<br>$p = .032$               | Frequently wreck dive<br>Occasionally wreck dive | Occasionally wreck dive<br>Rarely wreck dive<br>Wreck dived < 5 times<br>Rarely wreck dive |
| Technique/challenge    | Wreck penetration                            | 8    | 3.28 | $\chi^2 = 27.988, df = 4, p < .001$ | -                                                                  | Males                                            | Females                                                                                    |
|                        |                                              |      |      | $H(6) = 18.094, p = .006$           | $p = .003$                                                         | Australia                                        | United States                                                                              |
|                        |                                              |      |      | $H(6) = 15.580, p = .016$           | $p = .032$                                                         | >1,000 dives                                     | 21-50 dives                                                                                |
|                        |                                              |      |      | $H(6) = 63.527, p < .001$           | $p < .001$<br>$p = .001$<br>$p < .001$<br>$p = .022$<br>$p < .001$ | Technical                                        | Open water<br>Specialty<br>Advanced open water<br>Master scuba divers<br>Divemasters       |
|                        |                                              |      |      |                                     | $p = .027$                                                         | Instructor/master instructors                    | Open water                                                                                 |
|                        |                                              |      |      | $H(3) = 44.609, p < .001$           | $p < .001$<br>$p < .001$<br>$p < .001$                             | Frequently wreck dive                            | Occasionally wreck dive<br>Rarely wreck dive<br>Wreck dived < 5 times                      |

**Table S2: Motivations to wreck dive – Statistically significant differences (cont.)**

| Cluster                         | Motivation factor                  | Rank | Mean | $\chi^2$ or $H$ result             | Adjusted $p$ -value (pairwise comparison) | More important to       | Less important to                                                    |
|---------------------------------|------------------------------------|------|------|------------------------------------|-------------------------------------------|-------------------------|----------------------------------------------------------------------|
| Technique/challenge (continued) | Wreck penetration (continued)      | 8    | 3.28 | $H(3) = 12.528, p = .006$          | $p = .047$<br>$p = .014$                  | Frequently wreck dive   | Occasionally wreck dive<br>Rarely wreck dive                         |
|                                 | Photography                        | 9    | 3.22 | -                                  | -                                         | -                       | -                                                                    |
| Treasure hunting                |                                    |      |      | $\chi^2 = 9.517, df = 4, p = .049$ | -                                         | Males                   | Females                                                              |
|                                 |                                    |      |      | $H(3) = 15.652, p = .001$          | $p = .011$<br>$p = .026$                  | Trade qualifications    | Degree or higher degree                                              |
|                                 |                                    |      |      | $H(6) = 33.574, p < .001$          | $p < .001$<br>$p = .003$                  | Degree or higher degree | Diploma                                                              |
|                                 |                                    |      |      | $H(3) = 53.781, p < .001$          | $p < .001$<br>$p < .001$<br>$p = .001$    | Technical               | Advanced open water<br>Master scuba diver                            |
|                                 |                                    |      |      |                                    | $p < .001$<br>$p = .001$                  | Frequently wreck dive   | Occasionally wreck dive<br>Rarely wreck dive<br>Wreck dived <5 times |
|                                 |                                    |      |      |                                    | $p < .001$<br>$p = .001$                  | Occasionally wreck dive | Rarely wreck dive<br>Wreck dived <5 times                            |
|                                 | Collecting artefacts &/or fittings | 12   | 1.78 | $H(6) = 19.372, p = .004$          | $p = .008$                                | United States           | Other countries                                                      |
|                                 |                                    |      |      | $H(3) = 12.528, p = .006$          | $p = .047$<br>$p = .014$                  | Frequently wreck dive   | Occasionally wreck dive<br>Rarely wreck dive                         |

This table reports the outcomes of the statistical analyses to determine differences between frequency of wreck diving, diver profile and dive experience variables (Kruskal -Wallis test or Chi square)

**Table S3: Wreck diver attitudes to management controls – Statistically significant differences**

| Cluster              | Management control          | Rank | Mean | $\chi^2$ or $H$ result              | Adjusted $p$ -value (pairwise comparison)            | Higher level of agreement                                                              | Lower level of agreement                                     |
|----------------------|-----------------------------|------|------|-------------------------------------|------------------------------------------------------|----------------------------------------------------------------------------------------|--------------------------------------------------------------|
| High restriction     | Harsh penalties             | 1    | 4.00 | $\chi^2 = 14.550, df = 4, p = .006$ | -                                                    | Females                                                                                | Males                                                        |
|                      |                             |      |      | $H(6) = 65.902, p < .001$           | $p < .001$<br>$p < .001$<br>$p < .001$               | Australia<br>Japan<br>Other countries                                                  | United States<br>United States<br>United States              |
|                      |                             |      |      | $H(6) = 25.850, p < .001$           | $p = .029$<br>$p = .019$                             | Divemaster                                                                             | Open water<br>Technical                                      |
|                      |                             |      |      |                                     | $p = .033$<br>$p = .033$<br>$p = .021$               | Instructor/master instructor                                                           | Open water<br>Specialty<br>Technical                         |
|                      |                             |      |      | $H(6) = 25.053, p < .001$           | $p < .001$<br>$p = .026$<br>$p = .004$<br>$p = .001$ | $\leq 5$ years diving<br>6-10 years diving<br>11-15 years diving<br>21-25 years diving | >30 years diving                                             |
|                      |                             |      |      | $H(3) = 8.011, p = .046$            | $p = .038$                                           | Occasionally wreck dive                                                                | Frequently wreck dive                                        |
|                      | No visitation by divers     | 9    | 1.46 | $\chi^2 = 10.069, df = 4, p = .039$ | -                                                    | Females                                                                                | Males                                                        |
|                      |                             |      |      | $H(6) = 22.278, p = .001$           | $p < .001$                                           | Advanced open water                                                                    | Open water                                                   |
|                      |                             |      |      | $H(3) = 20.096, p < .001$           | $p = .003$<br>$p = .001$                             | Occasionally wreck dive<br>Rarely wreck dive                                           | Frequently wreck dive                                        |
| Moderate restriction | Permits to dive some wrecks | 2    | 3.31 | $\chi^2 = 20.270, df = 4, p < .001$ | -                                                    | Females                                                                                | Males                                                        |
|                      |                             |      |      | $H(5) = 16.739, p = .005$           | $p = .021$                                           | Aged 25-34 years                                                                       | Aged 45-54 years                                             |
|                      |                             |      |      | $H(6) = 19.160, p = .004$           | $p = .009$                                           | Japan                                                                                  | United States                                                |
|                      |                             |      |      | $H(6) = 19.860, p = .003$           | $p = .006$                                           | $\leq 5$ years diving                                                                  | >30 years diving                                             |
|                      |                             |      |      | $H(3) = 12.436, p = .006$           | $p = .017$                                           | Dived wrecks < 5 times                                                                 | Frequently wreck dive                                        |
|                      | Special certification       | 3    | 2.85 | $H(5) = 40.605, p < .001$           | $p = .001$<br>$p = .006$<br>$p < .001$               | Aged < 25 years                                                                        | Aged 45-54 years<br>Aged 55-64 years<br>Aged $\geq 65$ years |
|                      |                             |      |      |                                     | $p = .009$<br>$p = .001$                             | Aged 25-34 years                                                                       | Aged 45-54 years<br>Aged $\geq 65$ years                     |
|                      |                             |      |      |                                     | $p = .008$<br>$p < .001$                             | Aged 35-44 years                                                                       | 45-54 years<br>Aged $\geq 65$ years                          |
|                      |                             |      |      |                                     |                                                      |                                                                                        |                                                              |

**Table S3: Wreck diver attitudes to management controls – Statistically significant differences (cont.)**

| Cluster                          | Management control                          | Rank | Mean | $\chi^2$ or $H$ result              | Adjusted $p$ -value (pairwise comparison) | Higher level of agreement                    | Lower level of agreement                      |
|----------------------------------|---------------------------------------------|------|------|-------------------------------------|-------------------------------------------|----------------------------------------------|-----------------------------------------------|
| Moderate restriction (continued) | Special certification (continued)           | 3    | 2.85 | $H(6) = 39.268, p < .001$           | $p = .011$<br>$p < .001$                  | Japan                                        | Australia<br>United States                    |
|                                  |                                             |      |      |                                     | $p < .001$                                | Other countries                              | United States                                 |
|                                  |                                             |      |      | $H(6) = 30.438, p < .001$           | $p = .002$<br>$p < .001$                  | 51-100 dives                                 | >1,000 dives                                  |
|                                  |                                             |      |      |                                     |                                           | 101-250 dives                                | >1,000 dives                                  |
|                                  |                                             |      |      | $H(6) = 16.436, p = .012$           | $p = .009$                                | Divemasters                                  | Open water                                    |
|                                  |                                             |      |      | $H(6) = 39.682, p < .001$           | $p = .018$<br>$p = .001$                  | ≤5 years diving                              | 26-30 years diving<br>>30 years diving        |
|                                  |                                             |      |      |                                     | $p = .004$                                | 6-10 years diving                            | >30 years diving                              |
|                                  |                                             |      |      |                                     | $p = .013$                                | 11-15 years diving                           | >30 years diving                              |
|                                  | Some accessible wrecks off-limits to divers |      |      | $\chi^2 = 13.846, df = 4, p = .008$ | -                                         | Females                                      | Males                                         |
|                                  |                                             |      |      | $H(5) = 11.935, p = .036$           | $p = .014$                                | Aged 25-34 years                             | Aged 45-54 years                              |
|                                  |                                             |      |      | $H(3) = 19.245, p = .001$           | $p = .001$                                | Bachelor or higher degree                    | Trade qualifications                          |
|                                  |                                             |      |      | $H(6) = 18.645, p = .005$           | $p = .013$                                | Other countries                              | Australia                                     |
|                                  |                                             |      |      | $H(6) = 15.068, p = .020$           | $p = .007$                                | 51-100 dives                                 | >1,000 dives                                  |
|                                  |                                             |      |      | $H(6) = 15.104, p = .019$           | $p = .016$                                | Advanced open water                          | Technical                                     |
|                                  |                                             |      |      | $H(3) = 13.794, p = .003$           | $p = .036$<br>$p = .023$                  | Occasionally wreck dive<br>Rarely wreck dive | Frequently wreck dive                         |
|                                  | Underwater guide                            | 5    | 2.60 | $\chi^2 = 16.350, df = 4, p = .003$ | -                                         | Females                                      | Males                                         |
|                                  |                                             |      |      | $H(5) = 28.289, p < .001$           | $p = .031$<br>$p = .043$                  | Aged <25 years                               | Aged 45-54 years<br>Aged 55-64 years          |
|                                  |                                             |      |      |                                     | $p = .004$<br>$p = .007$                  | Aged 25-34 years                             | Aged 45-54 years<br>Aged 55-64 years          |
|                                  |                                             |      |      |                                     | $p = .029$                                | Aged 45-54 years                             | Aged ≥65 years                                |
|                                  |                                             |      |      |                                     | $p = .042$                                | Aged 55-64 years                             | Aged ≥65 years                                |
|                                  |                                             |      |      | $H(6) = 56.072, p < .001$           | $p < .001$<br>$p < .001$<br>$p < .001$    | Japan                                        | Australia<br>United States<br>Other countries |
|                                  |                                             |      |      |                                     | $p = .001$                                | Other countries                              | Australia                                     |
|                                  |                                             |      |      | $H(6) = 38.931, p < .001$           | $p = .002$<br>$p = .002$                  | 21-50 dives                                  | 501-1,000 dives<br>>1,000 dives               |
|                                  |                                             |      |      |                                     | $p = .003$<br>$p = .002$                  | 51-100 dives                                 | 501-1,000 dives<br>>1,000 dives               |
|                                  |                                             |      |      |                                     | $p = .015$<br>$p = .012$                  | 101-250 dives                                | 501-1,000 dives<br>>1,000 dives               |



**Table S3: Wreck diver attitudes to management controls – Statistically significant differences (cont.)**

| Cluster                          | Management control                           | Rank | Mean | $\chi^2$ or $H$ result    | Adjusted $p$ -value (pairwise comparison)                          | Higher level of agreement                                                                      | Lower level of agreement                                                                                |
|----------------------------------|----------------------------------------------|------|------|---------------------------|--------------------------------------------------------------------|------------------------------------------------------------------------------------------------|---------------------------------------------------------------------------------------------------------|
| Moderate restriction (continued) | Underwater guide (continued)                 | 5    | 2.60 | $H(6) = 67.437, p < .001$ | $p = .014$<br>$p < .001$<br>$p < .001$<br>$p < .001$<br>$p < .001$ | Open water<br>Advanced<br>Master scuba divers<br>Divemasters<br>Instructors/master instructors | Technical                                                                                               |
|                                  |                                              |      |      | $H(6) = 32.898, p < .001$ | $p = .027$<br>$p = .023$<br>$p = .028$<br>$p = .003$<br>$p < .001$ | $\leq 5$ years diving                                                                          | 6-10 years diving<br>11-15 years diving<br>21-25 years diving<br>26-30 years diving<br>>30 years diving |
|                                  |                                              |      |      | $H(3) = 49.418, p < .001$ | $p < .001$<br>$p < .001$<br>$p < .001$                             | Occasionally wreck dive<br>Rarely wreck dive<br>Dived wrecks < 5 times                         | Frequently wreck dive                                                                                   |
|                                  |                                              |      |      |                           | $p = .004$                                                         | Dived wrecks < 5 times                                                                         | Occasionally wreck dive                                                                                 |
|                                  |                                              |      |      |                           |                                                                    |                                                                                                |                                                                                                         |
| Low restriction                  | No controls                                  | 7    | 1.69 | $H(6) = 17.584, p = .007$ | $p = .010$                                                         | Japan                                                                                          | Other countries                                                                                         |
|                                  |                                              |      |      | $H(3) = 9.171, p = .018$  | $p = .023$                                                         | Dived wrecks < 5 times                                                                         | Frequently wreck dive                                                                                   |
|                                  |                                              |      |      | $H(6) = 20.663, p = .002$ | $p = .001$                                                         | United States                                                                                  | Other countries                                                                                         |
|                                  |                                              |      |      | $H(6) = 20.034, p = .003$ | $p = .002$<br>$p = .048$                                           | >30 years diving                                                                               | 11-15 years diving<br>16-20 years diving                                                                |
|                                  |                                              |      |      |                           |                                                                    |                                                                                                |                                                                                                         |
| Knowledge                        | Moving artefacts around a wreck site is okay | 8    | 1.60 | $H(5) = 17.474, p = .004$ | $p = .005$                                                         | Aged 45-54 years                                                                               | Aged 34-45 years                                                                                        |
|                                  |                                              |      |      | $H(6) = 15.700, p = .015$ | $p = .046$                                                         | United States                                                                                  | Other countries                                                                                         |
|                                  |                                              |      |      | $H(6) = 16.185, p = .013$ | $p = .032$                                                         | >30 diving                                                                                     | 11-15 years diving                                                                                      |

This table reports the outcomes of the statistical analyses to determine differences between frequency of wreck diving, diver profile and dive experience variables (Kruskal -Wallis test or Chi square)
